# Supplementary material for: Uncertainty, Complexity and Constraints: How do We Robustly Assess Biological Responses Under a Rapidly Changing Climate?
Source: Preprints.org preprint supplement (doi:10.20944/preprints202111.0244.v1), 2021-11-15
Supplement: Supplementary file 1 [file supplementary]

**Table A1. Three Climate Scenarios for the Southwest Colorado by 2035**

The following summary was compiled from three climate scenarios and a review of literature. The **Hot and Dry** scenario is from hadgem2-es.1.rcp85; the **Warm and Wet** is from cnrm-cm5.1.rcp45 and **Feast and Famine** is from cesm1-bgc.1.rcp85

| Scenarios                         | Hot and Dry                                                                                                                                                            | Warm and Wet                                                                                                              | Feast and Famine                                                                                                                                                                        |
|-----------------------------------|------------------------------------------------------------------------------------------------------------------------------------------------------------------------|---------------------------------------------------------------------------------------------------------------------------|-----------------------------------------------------------------------------------------------------------------------------------------------------------------------------------------|
| <b>Temperature</b>                | Annual temperature increases by 5F; At lower elevations: summer days with temperature above 77F (25C) increases by 1 month, and nights with temperature above 68F = 10 | Annual temperature increases by 2F; At lower elevations: summer days with temperature above 77F (25C) increases by 1 week | Annual temperature increases by 3F; At lower elevations: summer days with temperature above 77F (25C) increases by 2 weeks, and nights with temperature above 68F = 20                  |
| <b>Precipitation</b>              | Annual precipitation decreases by 10%; less frequent and more intense individual rain events; summer monsoon rains decrease by 20%                                     | Annual precipitation increases by 10%; more intense individual rain events; summer monsoon rains increase by 10%          | Annual precipitation does not change but much greater fluctuations year to year (leading to more frequent feast or famine conditions); El Nino of 1982/83 strength occurs every 7 years |
| <b>Runoff</b>                     | Runoff decreases by 20% and peak runoff occurs 3 weeks earlier                                                                                                         | Runoff volume does not change but peak runoff earlier by 1 week                                                           | Runoff decreases by 10% and peak runoff occurs 2 weeks earlier                                                                                                                          |
| <b>Heat Wave</b>                  | Severe and long lasting; every summer is warmer compared to 2002 or 2012 (5F above normal)                                                                             | Hot summers like 2002 and 2012 occur once every decade                                                                    | Hot summers like 2002 and 2012 occur once every 3 years                                                                                                                                 |
| <b>Drought</b>                    | More frequent drought years like 2002/2012 - every 5 years                                                                                                             | No change in frequency but moderate increases in intensity; fewer cases of multi-year drought                             | Drought years like 2002/2012 occur once every decade                                                                                                                                    |
| <b>Snowline or Freezing Level</b> | Snowline moves up by 1200ft                                                                                                                                            | Snowline moves up by 600ft                                                                                                | Snowline moves up by 900ft                                                                                                                                                              |
| <b>Wildfire</b>                   | Fire season widens by 1 month; greater fire frequency (12x) and extent (16x) in high elevation forest                                                                  | Increases in fire frequency (4x) and extent (6x)                                                                          | Fire risk during dry years is very high at all elevations b/c of large fuel build up from wet years; on average fire frequency increases 8x, and area burnt increases 11x               |
| <b>Dust Storms</b>                | Extreme spring dust events like 2009 every other year; causing snowmelt and peak runoff to be six weeks earlier                                                        | Same as current                                                                                                           | Frequency of extreme dust events increases from current but tied to extreme dry years                                                                                                   |
| <b>Flood Risk</b>                 | Flood less frequent but risk increases for big summer rain events                                                                                                      | Flood frequency increases substantially as well as the overall risk                                                       | Risk increases substantially during the wet years                                                                                                                                       |
| <b>Growing Season</b>             | Increases by 3 weeks                                                                                                                                                   | Increases by 1 week                                                                                                       | Increases by 2 weeks                                                                                                                                                                    |

## Three Climate Scenarios for the Southwest Colorado by 2035: Summary & Hard Numbers

|                         |                                                                                                                                                                                                                                                                                                                                                                                   |
|-------------------------|-----------------------------------------------------------------------------------------------------------------------------------------------------------------------------------------------------------------------------------------------------------------------------------------------------------------------------------------------------------------------------------|
| <b>Hot and Dry</b>      | <ul style="list-style-type: none"> <li>❑ Sustained and longer duration drought: 2002-like drought occurs every 5 years</li> <li>❑ Chronic summer-time dry conditions: Summer monsoons are significantly reduced (-20%)</li> <li>❑ Chronic summer time heat waves: Every summer warmer compared to 2002 (5°F above normal)</li> </ul>                                              |
| <b>Warm and Wet</b>     | <ul style="list-style-type: none"> <li>❑ Water availability does not change but climate is warmer</li> <li>❑ Timing of snowmelt, streamflow, growing season change but more moderate compared to other scenarios</li> <li>❑ Chronic flood risks because of increases in moisture and more heavy precipitation events</li> </ul>                                                   |
| <b>Feast and Famine</b> | <ul style="list-style-type: none"> <li>❑ No long-term droughts but more frequent and intermittent severe-drought conditions (2002 drought once every decade)</li> <li>❑ Large year-to-year fluctuations that go from “hot and dry” to “warm and wet” conditions</li> <li>❑ Doubling in the frequency of alternating extreme dry and wet conditions relative to present</li> </ul> |

|                                        | <b>Hot and Dry</b>   | <b>Warm and Wet</b>        | <b>Feast and Famine</b>                    |
|----------------------------------------|----------------------|----------------------------|--------------------------------------------|
| <b>Annual temperature increase (F)</b> | 5                    | >2                         | 2.9                                        |
| <b>Winter temperature increase (F)</b> | 4.1                  | 3.5                        | 3.3                                        |
| <b>Spring temperature increase (F)</b> | 3.8                  | 2.3                        | 2.2                                        |
| <b>Summer temperature increase (F)</b> | 6                    | 2.8                        | 3.4                                        |
| <b>Fall temperature increase (F)</b>   | 5.3                  | 2.1                        | 2.9                                        |
| <b>Annual precipitation (%)</b>        | decrease 10%         | increase 10%               | no change but large year to year variation |
| <b>Winter precipitation (%)</b>        | 19                   | 13                         | 6                                          |
| <b>Spring precipitation (%)</b>        | -9                   | 6                          | 0                                          |
| <b>Summer precipitation (%)</b>        | -19                  | 8                          | 3                                          |
| <b>Fall precipitation (%)</b>          | -15                  | 10                         | -9                                         |
| <b>Freezing level</b>                  | shifts up by 1200 ft | shifts up by 600 ft        | shifts up by 900 ft                        |
| <b>Runoff</b>                          | > 20% decrease       | stays the same as baseline | 10% decrease                               |
| <b>Timing of peak runoff</b>           | earlier by 3 weeks   | earlier by 1 week          | earlier by 2 weeks                         |
| <b>Summer monsoon</b>                  | decrease by 20%      | increase by 10%            | large year to year fluctuation             |
| <b>Summer like 2002</b>                | every summer         | every 10 years             | every 3 years                              |
| <b>Severe drought duration</b>         | 1-5 years            | 1 year                     | 1-2 years                                  |
| <b>2002/2012 Drought</b>               | every 5th year       | every 15th year            | every 10th year                            |
| <b>Strong El Nino return frequency</b> | no change            | no change                  | doubles                                    |

(Source: Imtiaz Rangwala, Western Water Assessment & NOAA PSD, Boulder; Renee Rondeau, Colorado Natural Heritage Program)
