# Supplementary material for: Uncertainty, Complexity and Constraints: How do We Robustly Assess Biological Responses Under a Rapidly Changing Climate?
Source: Preprints.org preprint supplement (doi:10.20944/preprints202111.0244.v1), 2021-11-15
Supplement: Supplementary file 2 [file supplementary]

Archive with 2 entries (2 files):
- TableA1_ClimateScenarios_SECR.pdf
- TableA2_White-talied_Ptarmigan_NorthernColoradoRange_SSA.pdf
